# Supplementary material
Source: PubMed Central journal article supplement (PMC8824437)
Supplement: 41571_2022_605_MOESM1_ESM.pdf [file 41571_2022_605_MOESM1_ESM.pdf]

---

**Supplementary information**

---

**Approvals in 2021: dangling Accelerated Approvals, drug dosing, new approvals and beyond**

---

In the format provided by the authors and unedited

**Supplementary Table 1 | Summary of FDA oncology drug approvals in 2021 (in decreasing chronological order)**

| Drug                                                        | Indication                                                                                                                                                                                                                                                                                             | Type  | Comments                             |
|-------------------------------------------------------------|--------------------------------------------------------------------------------------------------------------------------------------------------------------------------------------------------------------------------------------------------------------------------------------------------------|-------|--------------------------------------|
| Pembrolizumab                                               | Adjuvant treatment of adult or paediatric patients ( $\geq 12$ years of age) with stage IIB–IIC melanoma following complete resection                                                                                                                                                                  | Suppl | AAid, ODD, PR, RTOR                  |
| Rituximab                                                   | For paediatric patients ( $\geq 6$ months to $< 18$ years of age) with previously untreated, advanced-stage, CD20 <sup>+</sup> DLBCL, Burkitt lymphoma, Burkitt-like lymphoma or mature B cell acute leukaemia                                                                                         | Suppl | AAid, PR                             |
| Daratumumab + hyaluronidase-fihj                            | In combination with carfilzomib and dexamethasone in patients with R/R MM who have received 1–3 prior lines of therapy                                                                                                                                                                                 | Suppl | AAid                                 |
| Pafolacianine                                               | For adult women with ovarian cancer as an adjunct for interoperative identification of malignant lesions                                                                                                                                                                                               | New   | ODD, PR                              |
| Sirolimus protein-bound particles for injectable suspension | For adults with locally advanced unresectable or metastatic malignant perivascular epithelioid cell tumours                                                                                                                                                                                            | New   | AAid, BTd, ODD, PR                   |
| Pembrolizumab                                               | Adjuvant treatment of patients with RCC at intermediate-high or high risk of recurrence following nephrectomy, or following nephrectomy and resection of metastatic lesions                                                                                                                            | Suppl | AAid, PR, Orbis <sup>a</sup>         |
| Asciminib                                                   | AA for patients with Ph <sup>+</sup> CML in chronic phase, previously treated with $\geq 2$ TKIs; regular approval for adults with Ph <sup>+</sup> CML in chronic phase harbouring T315I mutation in <i>BCR-ABL1</i>                                                                                   | New   | AA, AAid, BTd, ODD, PR, RTOR         |
| Atezolizumab                                                | Adjuvant treatment following resection and platinum-based chemotherapy in patients with stage II–IIIA NSCLC and PD-L1 expression on $\geq 1\%$ of tumour cells, as determined by an FDA-approved test                                                                                                  | Suppl | AAid, Orbis <sup>a</sup> , PR, RTOR, |
| Pembrolizumab                                               | For patients with persistent, recurrent or metastatic cervical cancer that is positive for PD-L1 expression (CPS $\geq 1$ ), as determined by an FDA-approved test, in combination with chemotherapy, with or without bevacizumab                                                                      | Suppl | AAid, Orbis <sup>a</sup> , PR        |
| Abemaciclib                                                 | In combination with endocrine therapy (tamoxifen or an aromatase inhibitor) for adjuvant treatment in patients with HR <sup>+</sup> HER2 <sup>-</sup> , node-positive, early-stage breast cancer at high risk of recurrence and with a Ki-67 score $\geq 20\%$ , as determined by an FDA-approved test | Suppl | AAid, RTOR                           |

|                          |                                                                                                                                                                                                                                                   |       |                                             |
|--------------------------|---------------------------------------------------------------------------------------------------------------------------------------------------------------------------------------------------------------------------------------------------|-------|---------------------------------------------|
| Brexucabtagene autoleucl | For adult patients with R/R B cell precursor ALL                                                                                                                                                                                                  | Suppl | AAid, BTd, ODD, PR                          |
| Ruxolitinib              | Chronic GVHD after failure of 1–2 lines of systemic therapy in adult and paediatric patients ( $\geq 12$ years of age)                                                                                                                            | Suppl | ODD, Orbis <sup>a</sup> , PR                |
| Tisotumab vedotin-tftv   | Patients with recurrent or metastatic cervical cancer with disease progression on or after chemotherapy                                                                                                                                           | New   | AA, AAid, PR                                |
| Cabozantinib             | For adult and paediatric patients ( $\geq 12$ years of age) with locally advanced or metastatic differentiated thyroid cancer that has progressed following VEGFR-targeted therapy and who are ineligible for or refractory to radioactive iodine | Suppl | AAid, BTd, ODD, PR                          |
| Mobocertinib             | For adults with locally advanced or metastatic NSCLC with <i>EGFR</i> exon 20 insertion mutations, as detected by an FDA-approved test, that has progressed on or after platinum-based chemotherapy                                               | New   | AA, AAid, BTd, ODD, Orbis <sup>a</sup> , PR |
| Zanubrutinib             | For adults with R/R MZL after at least one anti-CD20-based regimen                                                                                                                                                                                | Suppl | AA, AAid, ODD, PR                           |
| Zanubrutinib             | For adults with Waldenström macroglobulinaemia                                                                                                                                                                                                    | Suppl | AAid, ODD                                   |
| Ivosidenib               | For adults with previously treated, locally advanced or metastatic cholangiocarcinoma with an <i>IDH1</i> mutation, as detected by an FDA-approved test.                                                                                          | Suppl | AAid, ODD, PR                               |
| Nivolumab                | Adjuvant treatment of patients with urothelial carcinoma who are at high risk of recurrence after undergoing radical resection                                                                                                                    | Suppl | AAid, PR, RTOR                              |
| Dostarlimab-gxly         | For adults with dMMR recurrent or advanced solid tumours, as determined by an FDA-approved test, that have progressed on or following prior treatment and who have no satisfactory alternative treatment options                                  | New   | AA, AAid, PR                                |
| Belzutifan               | For adults with von Hippel–Lindau disease who require therapy for associated RCC, CNS haemangioblastomas or pancreatic neuroendocrine tumours, not requiring immediate surgery                                                                    | New   | AAid, Orbis <sup>a</sup> , PR, RTOR         |
| Lenvatinib               | In combination with pembrolizumab for first-line treatment of advanced RCC                                                                                                                                                                        | Suppl | AAid, BTd, PR, RTOR                         |
| Pembrolizumab            | In combination with lenvatinib for first-line treatment of advanced RCC                                                                                                                                                                           | Suppl | AAid, BTd, PR, RTOR                         |

|                                                      |                                                                                                                                                                                                                                                                                                                                                                                |       |                                              |
|------------------------------------------------------|--------------------------------------------------------------------------------------------------------------------------------------------------------------------------------------------------------------------------------------------------------------------------------------------------------------------------------------------------------------------------------|-------|----------------------------------------------|
| Pembrolizumab                                        | As monotherapy for patients with high-risk, early stage TNBC in combination with chemotherapy as neoadjuvant treatment, and then continued as a single agent as adjuvant treatment after surgery; in combination with chemotherapy for patients with locally recurrent unresectable or metastatic TNBC expressing PD-L1 (CPS $\geq$ 10), as determined by an FDA-approved test | Suppl | AAid, BTd, PR, RTOR                          |
| Pembrolizumab                                        | In combination with lenvatinib for women with advanced endometrial carcinoma that is not MSI-H or dMMR, who have disease progression following prior systemic therapy in any setting and are not candidates for curative surgery or radiation                                                                                                                                  | Suppl | AAid, BTd, PR                                |
| Lenvatinib                                           | In combination with pembrolizumab for women with advanced endometrial carcinoma that is not MSI-H or dMMR, who have disease progression following prior systemic therapy in any setting and are not candidates for curative surgery or radiation                                                                                                                               | Suppl | AAid, BTd, PR                                |
| Belumosudil                                          | For adult and paediatric patients ( $\geq$ 12 years of age) with chronic GVHD after $\geq$ 2 prior lines of systemic therapy                                                                                                                                                                                                                                                   | New   | AAid, BTd, Orbis <sup>a</sup> , PR, RTOR     |
| Daratumumab and hyaluronidase-fihj                   | In combination with pomalidomide and dexamethasone for the treatment of patients with MM after at least one prior line of therapy including lenalidomide and a proteasome inhibitor                                                                                                                                                                                            | Suppl | AAid                                         |
| Enfortumab vedotin-ejfv                              | Locally advanced or metastatic urothelial cancer                                                                                                                                                                                                                                                                                                                               | Suppl | AAid, BTd, Orbis <sup>a</sup> , PR, RTOR     |
| Asparaginase erwinia chrysanthemi (recombinant)-rywn | As a component of a multi-agent chemotherapeutic regimen for the treatment of ALL and lymphoblastic lymphoma in adults and paediatric patients ( $\geq$ 1 month of age) who have hypersensitivity to <i>E. coli</i> -derived asparaginase                                                                                                                                      | New   | AAid, ODD, Orbis <sup>a</sup> , RTOR         |
| Avapritinib                                          | For adult patients with advanced systemic mastocytosis                                                                                                                                                                                                                                                                                                                         | Suppl | BTd, ODD, PR                                 |
| Infigratinib                                         | For adults with previously treated, unresectable locally advanced or metastatic cholangiocarcinoma harbouring an <i>FGFR2</i> fusion or other rearrangement, as detected by an FDA-approved test                                                                                                                                                                               | New   | AA, AAid, ODD, Orbis <sup>a</sup> , PR, RTOR |

|                              |                                                                                                                                                                                                                                |       |                                                   |
|------------------------------|--------------------------------------------------------------------------------------------------------------------------------------------------------------------------------------------------------------------------------|-------|---------------------------------------------------|
| Sotorasib                    | For adults with <i>KRAS</i> <sup>G12C</sup> -mutated locally advanced or metastatic NSCLC, as determined by an FDA-approved test, who have received at least one prior systemic therapy                                        | New   | AA, AAid, BTd, ODD, Orbis <sup>a</sup> , PR, RTOR |
| Piflufolastat F-18 injection | For PET detection of PSMA <sup>+</sup> lesions in men with prostate cancer with suspected metastasis who are candidates for initial definitive therapy or with suspected disease recurrence based on elevated serum PSA levels | New   | PR                                                |
| Amivantamab-vmjw             | For adults with locally advanced or metastatic NSCLC with <i>EGFR</i> exon 20 insertion mutations, as detected by an FDA-approved test, that has progressed on or after platinum-based chemotherapy                            | New   | AA, AAid, BTd, Orbis <sup>a</sup> , PR            |
| Nivolumab                    | For patients with completely resected oesophageal or GEJ cancer with residual pathological disease following neoadjuvant chemoradiotherapy                                                                                     | Suppl | AAid, ODD, Orbis <sup>a</sup> , PR, RTOR          |
| Pembrolizumab                | First-line treatment of patients with locally advanced unresectable or metastatic HER2 <sup>+</sup> G/GEJ adenocarcinoma in combination with trastuzumab, fluoropyrimidine-containing and platinum-containing chemotherapy     | Suppl | AA, AAid, PR, RTOR                                |
| Loncastuximab tesirine-lpyl  | For adults with R/R LBCL after ≥2 lines of systemic therapy, including DLBCL not otherwise specified, DLBCL arising from low-grade lymphoma, and high-grade B cell lymphoma                                                    | New   | AA, AAid, ODD, PR                                 |
| Dostarlimab-gxly             | For women with recurrent or advanced-endometrial cancer that is dMMR, as determined by an FDA-approved test, and has progressed on or following a prior platinum-containing regimen                                            | New   | AA, AAid, BTd, PR, RTOR                           |
| Nivolumab                    | For patients with advanced or metastatic G/GEJ or oesophageal adenocarcinoma in combination with fluoropyrimidine-containing and platinum-containing chemotherapy                                                              | Suppl | AAid, ODD, Orbis <sup>a</sup> , PR, RTOR          |
| Sacituzumab govitecan        | For patients with locally advanced or metastatic urothelial cancer who previously received a platinum-containing chemotherapy and either an anti-PD-1 or anti-PD-L1 antibody                                                   | Suppl | AA, AAid, PR, RTOR                                |
| Sacituzumab govitecan        | For patients with unresectable locally advanced or metastatic TNBC who have received ≥2 prior systemic therapies, at least one of them for metastatic disease                                                                  | Suppl | AAid, BTd, Orbis <sup>a</sup> , PR, RTOR          |
| Cetuximab                    | <i>KRAS</i> -wild-type, <i>EGFR</i> <sup>+</sup> CRC or HNSCC                                                                                                                                                                  | Suppl |                                                   |

|                         |                                                                                                                                                                                                                                                                                                                                                                  |       |                                          |
|-------------------------|------------------------------------------------------------------------------------------------------------------------------------------------------------------------------------------------------------------------------------------------------------------------------------------------------------------------------------------------------------------|-------|------------------------------------------|
| Isatuximab-irfc         | In combination with carfilzomib and dexamethasone for the treatment of adults with R/R MM who have received 1–3 prior lines of therapy                                                                                                                                                                                                                           | Suppl | AAid, ODD                                |
| Idecabtagene vicleucel  | For adults with R/R MM after ≥4 prior lines of therapy, including an immunomodulatory agent, a proteasome inhibitor and an anti-CD38 monoclonal antibody                                                                                                                                                                                                         | New   | BTD, ODD, PR                             |
| Pembrolizumab           | In combination with platinum and fluoropyrimidine-based chemotherapy, for patients with metastatic or locally advanced oesophageal or GEJ (tumours with epicentre 1–5 cm above the gastrointestinal junction) carcinoma who are not candidates for surgical resection or definitive chemoradiotherapy                                                            | Suppl | AAid, Orbis <sup>a</sup> , PR, RTOR      |
| Tivozanib               | For adults with R/R advanced RCC following ≥2 prior systemic therapies                                                                                                                                                                                                                                                                                           | New   |                                          |
| Axicabtagene ciloleucel | For adults with R/R FL after ≥2 lines of systemic therapy                                                                                                                                                                                                                                                                                                        | Suppl | BTD, PR                                  |
| Lorlatinib              | For patients with metastatic NSCLC that is <i>ALK</i> -rearranged, as detected by an FDA-approved test                                                                                                                                                                                                                                                           | Suppl | AAid, ODD, Orbis <sup>a</sup> , PR, RTOR |
| Melphalan flufenamide   | For adults with R/R MM who have received ≥4 prior lines of therapy and with disease is refractory to at least one proteasome inhibitor, one immunomodulatory agent and one anti-CD38 monoclonal antibody                                                                                                                                                         | New   | AA, ODD, PR                              |
| Cemiplimab-rwlc         | First-line treatment of patients with advanced NSCLC (patients with locally advanced disease who are not candidates for surgical resection or definitive chemoradiation, or with metastatic disease) and who have high tumoural PD-L1 expression (TPS ≥50%), as determined by an FDA-approved test, with no <i>EGFR</i> , <i>ALK</i> or <i>ROS1</i> aberrations. | Suppl | AAid, PR                                 |
| Cemiplimab-rwlc         | Regular approval for patients with locally advanced BCC previously treated with a Hedgehog inhibitor or for whom such an inhibitor is not appropriate; AA for patients with metastatic BCC previously treated with a Hedgehog inhibitor or for whom such an inhibitor is not appropriate                                                                         | Suppl | AA, AAid, PR                             |

|                                 |                                                                                                                                                                                                                             |       |                                         |
|---------------------------------|-----------------------------------------------------------------------------------------------------------------------------------------------------------------------------------------------------------------------------|-------|-----------------------------------------|
| Lisocabtagene maraleucel        | For adults with R/R LBCL after ≥2 lines of systemic therapy, including DLBCL not otherwise specified (including DLBCL arising from indolent lymphoma), high-grade B cell lymphoma, primary mediastinal LBCL and FL grade 3B | New   | BTD, ODD, PR, RMATD                     |
| Umbralisib                      | For adults with R/R MZL who have received at least one prior anti-CD20-based regimen and for adults with R/R FL who have received ≥3 prior lines of systemic therapy                                                        | New   | AA, AAid, ODD, PR                       |
| Tepotinib                       | For adults with metastatic NSCLC harbouring <i>MET</i> exon 14 skipping alterations                                                                                                                                         | New   | AA, AAid, Orbis <sup>a</sup> , PR, RTOR |
| Cabozantinib                    | First-line treatment of patients with advanced RCC in combination with nivolumab                                                                                                                                            | Suppl | AAid, PR, RTOR                          |
| Nivolumab                       | First-line treatment of patients with advanced RCC in combination with cabozantinib                                                                                                                                         | Suppl | AAid, PR, RTOR                          |
| Daratumumab + hyaluronidase     | For adults with newly diagnosed light-chain amyloidosis, in combination with bortezomib, cyclophosphamide and dexamethasone                                                                                                 | Suppl | AA, AAid, Orbis <sup>a</sup> , RTOR     |
| Fam-trastuzumab deruxtecan-nxki | For adults with locally advanced or metastatic HER2 <sup>+</sup> G/GEJ adenocarcinoma who have received a prior trastuzumab-based regimen                                                                                   | Suppl | AAid, BTD, ODD, PR                      |
| Crizotinib                      | For paediatric patients (≥1 year of age) and young adults with R/R systemic <i>ALK</i> -rearranged ALCL                                                                                                                     | Suppl | AAid, BTD, ODD, PR                      |

AA, accelerated approval; ALCL, anaplastic large cell lymphoma; AAid, assessment aid; ALL, acute lymphoblastic leukaemia; BCC, basal cell carcinoma; BTD, breakthrough therapy designation; CNS, central nervous system; CPS, combined positive score; CRC, colorectal cancer; dMMR, mismatch-repair deficient; DLBCL, diffuse large B cell lymphoma; FL, follicular lymphoma; GEJ, gastroesophageal junction; G/GEJ, gastric or GEJ; GVHD, graft-versus-host disease; HNSCC, squamous cell carcinoma of the head and neck; LBCL, large B cell lymphoma; MM, multiple myeloma; MSI-H, microsatellite instability high; MZL, marginal zone lymphoma; NSCLC, non-small-cell lung cancer; ODD, orphan drug designation; Ph<sup>+</sup> CML, Philadelphia chromosome-positive chronic myeloid leukaemia; PR, priority review; RCC, renal cell carcinoma; RMATD, regenerative medicine advanced therapy designation; R/R, relapsed and/or refractory; RTOR, Real-Time Oncology Review; Suppl, supplement; TKI, tyrosine-kinase inhibitor; TNBC, triple-negative breast cancer; TPS, tumour proportion score.

<sup>a</sup>Concurrent submission and review of oncology products among international partners through Project Orbis.
